# Supplementary material for: Automated compound speciation, cluster analysis, and quantification of organic vapors and aerosols using comprehensive two-dimensional gas chromatography and mass spectrometry
Source: Copernicus journal article supplement (doi:10.5194/acp-24-10655-2024), 2024-09-24
Supplement: Supplementary file 1 [file acp-24-10655-2024-supplement.pdf]

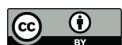

*Supplement of*

**Automated compound speciation, cluster analysis, and quantification of organic vapors and aerosols using comprehensive two-dimensional gas chromatography and mass spectrometry**

**Xiao He et al.**

*Correspondence to:* Xuan Zheng (x-zheng11@szu.edu.cn)

The copyright of individual parts of the supplement might differ from the article licence.

## S1. Indicative reaction schemes that are included in the model development

Compounds containing hydrocarbon chains generate a series of ions separated by 14 Da ( $-\text{CH}_2-$ ) in their mass spectra, with the specific masses depending on their chemical structures. For example, aliphatic alkanes, including *n*-*i*-alkanes, regularly dissociate to form ions with mass-to-charge ratios ( $m/z$ ) of 43, 57, 71, and 85, corresponding to  $\text{C}_3\text{H}_7$ ,  $\text{C}_4\text{H}_9$ ,  $\text{C}_5\text{H}_{11}$ , and  $\text{C}_6\text{H}_{13}$ , respectively. The  $\text{M}^+$  ion is weakly observed (Lavanchy, Houriet and G  umann 1979). Aliphatic alkenes exhibit the most abundant ion fragments at  $m/z$  41, 55, 69, and 83. A short alkyl chain attached to the benzene ring yields a prominent peak at  $m/z$  91, with the base peak (ion with the highest abundance relative to other ions in the mass spectrum) gradually shifting to larger ions as the alkyl chain lengthens. Saturated rings lose one methyl group to produce an abundant  $[\text{M} - 15]^+$  signal. The appearance of the  $m/z$  60 peak for carboxylic acids is a characteristic feature of the McLafferty rearrangement, providing valuable information about the identification of the compounds (Figure S3b). Aliphatic alcohols frequently cleave at the  $\beta$  bond, yielding a resonance-stabilized ion at  $m/z$  31 (Figure S3c). In contrast, aromatic alcohols generate a prominent  $\text{M}^+$  ion, as the case for phenols. Esters, composed of alcohol and acid components, exhibit distinctive fragmentation patterns depending on the major component. When the acid component predominates, the fragmentation is partially characterized by typical acid peaks, where the loss of an alkyl radical through  $\alpha$ -cleavage occurs predominantly, producing a discernable peak at  $m/z$  74 (Figure S3f). Conversely, when the alcohol component dominates, fragmentation patterns resemble those of alcohols (Figure S3g). Trimethylsilyl derivatization is commonly used in GC analysis, with observed abundant fragments at  $m/z$  73 and 147 (He et al. 2018). Water elimination, indicated by an 18 Da loss, is common for hydroxyl groups (Harrison 2012). The McLafferty rearrangement is prominent in the mass spectra due to  $\gamma$ -hydrogen atom transfer to a keto-group and the  $\beta$ -cleavage through a six-atom ring where appropriate (McLafferty 1959). Besides, the heteroatoms (e.g., oxygen) suppress  $\text{M}^+$  appearance, while the conjugated aromatic rings intensify the  $\text{M}^+$ . Aliphatic amines often undergo cleavage at the  $\alpha$ -C-C bond to produce relatively stable ions:  $\text{CH}_2\text{NH}_2^+$  ( $m/z$  30),  $\text{C}_2\text{H}_4\text{NH}_2^+$  ( $m/z$  44), and  $\text{C}_3\text{H}_6\text{NH}_2^+$  ( $m/z$  58) for amine groups attached to the primary, secondary, and tertiary carbons, respectively (Figure S4a) (Mikaia 2022).  $\text{M}^+$  is frequently detected for amides, following the nitrogen rule.  $\alpha$ -cleavage or McLafferty rearrangement produces dominant ions in the mass spectrum, as depicted in Figure S4b. Neutral loss of  $\text{HC}\equiv\text{N}$  and McLafferty rearrangement produce abundant  $[\text{M} - 27]^+$  and  $m/z$  41 ions for nitriles. C-N and N-O bonds are weak for aliphatic nitro compounds, and  $\text{M}^+$  is rarely observed in the EI spectrum. Aromatic nitro compounds exhibit additional fragmentation patterns involving ring arrangements and ring-opening reactions. The dominant ions originate from the loss of  $\text{NO}^+$  ( $m/z$  30) or  $\text{NO}_2^+$  ( $m/z$  46).

When incorporating these rules into the data treatment software (Canvas, version 2.5, J&X Technologies), several steps are necessary, as depicted in Figure S5. The software offers four built-in features: ABUND (X) returns the normalized abundance of the input ion mass; HASMASS (X) indicates whether the input ion exists; ORDER (X) specifies the order of the input ion mass; MASS (X) returns the mass of the input ion's order. Additionally, the function supports two logical operators, "And" and "Or". Subsequently, cluster of alkanes can be extracted by the following rules:  $((\text{MASS}(1)=43 \ \&\& \ (\text{MASS}(2)=57 \ \parallel \ \text{MASS}(2)=71 \ \parallel \ \text{MASS}(2)=41)) \ \parallel \ (\text{MASS}(1)=57 \ \&\& \ (\text{MASS}(2)=43 \ \parallel \ \text{MASS}(2)=71 \ \parallel \ \text{MASS}(2)=41)))$  where "&&" and " $\parallel$ " refers to the logical operators "And" and "Or", respectively. Paste the rules in Ion Extractor Editor and the cluster of alkanes can be isolated.

Similar, the cluster of aliphatic amines can be extracted by the following rules:

$(\text{MASS}(1) = 30 \ \&\& \ \text{ABUND}(\text{MASS}(2)) < 20) \parallel (\text{MASS}(1) = 58 \ \&\& \ \text{ABUND}(\text{MASS}(2)) < 40) \parallel (\text{MASS}(1) = 58 \ \&\& \ \text{MASS}(2) = 59) \parallel (\text{MASS}(1) = 30 \ \&\& \ (\text{MASS}(2) = 31 \ \parallel \ \text{MASS}(2) = 28)) \parallel ((\text{ABUND}(30) + \text{ABUND}(44)) > 100)$

In total, the extraction rules for 26 compound clusters are constructed with high accuracy and repeatability.

## S2. The description of unresolved peaks

The unidentified peaks accounted for 15%, 18%, and less than 1% for HDDV vapor, HDDV aerosol, and ambient aerosol samples, respectively. These identified peaks can be divided into three sub-categories:

The first category comprises column bleedings that regularly appear in the GC $\times$ GC plot underneath alkane groups. Most column bleedings occur towards the end of GC thermal program when the temperature exceed 240  $^\circ\text{C}$ . These column bleedings were promptly identified and removed at the

outset of the data treatment process. Some column bleedings with aliphatic siloxane skeletons appeared regularly throughout the GC×GC tests. The number of silicon atoms within the skeletons varied much, resulting in different characteristic ions. These bleeding peaks often overlapped with chromatographic peaks. Their mass spectra and example chemical structures are shown in Figure S6.

The second category includes ester compounds scattering in the GC×GC plot. We have observed some aliphatic ester peaks in the middle of the GC×GC plot, one example given in Figure S7. Their mass spectra were compared to the National Institute of Standards and Technology (NIST) library, and these peaks were identified with high match scores. However, these ester peaks were infrequent, contributing to less than 1% of the total signal, and were not consistently detected in every sample. In this regard, the ester compounds were not further discussed and classified as unidentified.

The third category pertains to the unresolved peaks literally. The mass spectra of these peaks were disorganized and lacked distinct patterns. Some fragment ions originated from their own peaks, while others were interferences from the matrix. These peaks could not be categorized into any specific groups within the model and were labeled as unidentified.

Table S1. Information of the two test HDDVs.

| Vehicle ID | Emission standard | Aftertreatment                | Model year | Gross vehicle weight (kg) | Vehicle type         | Mileage ( $\times 10^3$ km) | Engine model |
|------------|-------------------|-------------------------------|------------|---------------------------|----------------------|-----------------------------|--------------|
| #1         | China V           | Selective catalytic reduction | 2021       | 25000                     | Semi-trailer tractor | 22.2                        | dCi450-51    |
| #2         | China V           | Selective catalytic reduction | 2021       | 25000                     | Semi-trailer tractor | 34.8                        | MC13.54-50   |

Table S2. List of ambient samples and the corresponding PM concentration.

| Sample ID | Collection date | PM <sub>2.5</sub> concentration ( $\mu\text{g}/\text{m}^3$ ) | PM <sub>10</sub> concentration ( $\mu\text{g}/\text{m}^3$ ) |
|-----------|-----------------|--------------------------------------------------------------|-------------------------------------------------------------|
| #1        | 1-Nov-2023      | 17                                                           | 38                                                          |
| #2        | 5-Nov-2023      | 14                                                           | 28                                                          |
| #3        | 10-Nov-2023     | 16                                                           | 35                                                          |
| #4        | 11-Nov-2023     | 13                                                           | 28                                                          |
| #5        | 17-Nov-2023     | 19                                                           | 66                                                          |
| Blank     | 17-Nov-2023     | 19                                                           | 66                                                          |

Table S3. List of the deuterated internal standards.

| Internal standard                     | Formula                         |
|---------------------------------------|---------------------------------|
| <i>n</i> -Dodecane-d <sub>26</sub>    | C <sub>12</sub> D <sub>26</sub> |
| <i>n</i> -Hexadecane-d <sub>34</sub>  | C <sub>16</sub> D <sub>34</sub> |
| <i>n</i> -Eicosane-d <sub>42</sub>    | C <sub>20</sub> D <sub>42</sub> |
| <i>n</i> -Tetracosane-d <sub>50</sub> | C <sub>24</sub> D <sub>50</sub> |
| <i>n</i> -Octacosane-d <sub>58</sub>  | C <sub>28</sub> D <sub>58</sub> |
| Naphthalene-d <sub>8</sub>            | C <sub>10</sub> D <sub>8</sub>  |
| Acenaphthene-d <sub>10</sub>          | C <sub>12</sub> D <sub>10</sub> |
| Phenanthrene-d <sub>10</sub>          | C <sub>14</sub> D <sub>10</sub> |
| Chrysene-d <sub>12</sub>              | C <sub>18</sub> D <sub>12</sub> |

Table S4. The list and linear correlation of the authentic standards.

| Group   | Name                  | 1 <sup>st</sup> RT (min) | 2 <sup>nd</sup> RT (s) | R <sup>2</sup> |
|---------|-----------------------|--------------------------|------------------------|----------------|
| Acid    | Isobutyric Acid       | 4.67                     | 1.25                   | 0.99           |
| Acid    | 2-Methyl butyric acid | 7.07                     | 1.36                   | 0.99           |
| Alcohol | 1-Decanol             | 19.67                    | 1.42                   | 0.98           |
| Alcohol | 1-Hexadecanol         | 34.14                    | 1.38                   | 0.96           |

|               |                  |       |      |      |
|---------------|------------------|-------|------|------|
| Alcohol       | n-Nonadecanol    | 39.94 | 1.39 | 0.95 |
| Alcohol       | 1-Docosanol      | 45.00 | 1.43 | 0.99 |
| Aldehyde      | Octanal          | 11.60 | 1.48 | 1.00 |
| Aldehyde      | Decanal          | 17.80 | 1.46 | 0.99 |
| Aldehyde      | Pentanal         | 3.73  | 1.17 | 0.97 |
| Aldehyde      | Hexanal          | 5.67  | 1.41 | 1.00 |
| Aldehyde      | Decanal          | 17.80 | 1.55 | 0.99 |
| Alkane        | Heptane          | 3.74  | 0.74 | 0.97 |
| Alkane        | Octane           | 5.60  | 0.87 | 0.98 |
| Alkane        | Nonane           | 8.34  | 0.94 | 1.00 |
| Alkane        | Decane           | 11.47 | 0.97 | 1.00 |
| Alkane        | Undecane         | 14.67 | 0.98 | 0.99 |
| Alkane        | Dodecane         | 17.67 | 0.97 | 0.97 |
| Alkane        | Tridecane        | 20.47 | 0.99 | 0.97 |
| Alkane        | Tetradecane      | 23.20 | 0.98 | 0.99 |
| Alkane        | Pentadecane      | 25.67 | 1.00 | 0.99 |
| Alkane        | Hexadecane       | 28.07 | 0.98 | 0.99 |
| Alkane        | Heptadecane      | 30.34 | 1.00 | 0.97 |
| Alkane        | Octadecane       | 32.54 | 1.04 | 0.97 |
| Alkane        | Nonadecane       | 34.60 | 1.03 | 0.99 |
| Alkane        | Eicosane         | 36.54 | 1.07 | 0.96 |
| Alkane        | Heneicosane      | 38.40 | 1.08 | 0.96 |
| Alkane        | Docosane         | 40.20 | 1.11 | 0.98 |
| Alkane        | Tricosane        | 41.94 | 1.12 | 0.97 |
| Alkane        | Tetracosane      | 43.60 | 1.12 | 0.97 |
| Alkane        | Pentacosane      | 45.20 | 1.17 | 0.99 |
| Alkane        | Hexacosane       | 46.74 | 1.22 | 0.99 |
| Alkane        | Heptacosane      | 48.20 | 1.20 | 0.98 |
| Alkane        | Octacosane       | 49.60 | 1.25 | 0.98 |
| Alkane        | Nonacosane       | 51.00 | 1.27 | 0.97 |
| Alkane        | triacontane      | 52.34 | 1.33 | 0.96 |
| Alkane        | Hentriacontane   | 53.60 | 1.41 | 0.97 |
| Alkane        | Dotriacontane    | 54.87 | 1.53 | 0.96 |
| Alkane        | Tritriacontane   | 56.14 | 1.77 | 0.96 |
| Alkane        | Tetratriacontane | 57.60 | 2.09 | 0.96 |
| Alkane        | Pentatriacontane | 59.27 | 2.46 | 0.99 |
| Alkene        | 1-Octene         | 5.39  | 0.90 | 0.99 |
| Alkene        | 1-Octadecene     | 32.39 | 1.07 | 0.99 |
| Alkene        | 1-Docosene       | 40.13 | 1.13 | 0.99 |
| Alkene        | 1-Decene         | 11.19 | 0.99 | 0.98 |
| Alkene        | 1-Dodecene       | 17.39 | 1.03 | 0.96 |
| Alkene        | 1-Tetradecene    | 22.99 | 1.02 | 0.98 |
| Alkyl-benzene | Ethylbenzene     | 7.27  | 1.46 | 1.00 |
| Alkyl-benzene | p-Xylene         | 7.54  | 1.42 | 0.99 |

|               |                              |       |      |      |
|---------------|------------------------------|-------|------|------|
| Alkyl-benzene | o-Xylene                     | 8.14  | 1.57 | 0.99 |
| Alkyl-benzene | Isopropylbenzene             | 9.07  | 1.51 | 1.00 |
| Alkyl-benzene | 1,3,5-Trimethylbenzene       | 10.54 | 1.55 | 0.99 |
| Alkyl-benzene | Butyl-benzene                | 13.27 | 1.55 | 0.99 |
| Alkyl-benzene | Pentyl-benzene               | 16.40 | 1.54 | 0.97 |
| Alkyl-benzene | Hexyl-benzene                | 19.40 | 1.50 | 0.97 |
| Alkyl-benzene | 4-Ethyltoluene               | 10.40 | 1.61 | 0.98 |
| Alkyl-benzene | p-Cymene                     | 12.33 | 1.61 | 0.97 |
| Alkyl-PAHs    | 1-Methylnaphthalene          | 20.87 | 2.44 | 1.00 |
| Alkyl-PAHs    | 1-Ethylnaphthalene           | 23.14 | 2.41 | 0.97 |
| Amide         | Acetamide                    | 5.07  | 2.51 | 1.00 |
| Amide         | Propanamide                  | 7.00  | 2.79 | 0.96 |
| Amide         | N,N-Dibutylformamide         | 20.54 | 1.95 | 0.95 |
| Amine         | Triethylamine                | 3.60  | 0.86 | 0.99 |
| Amine         | Dibutylamine                 | 10.27 | 1.18 | 0.99 |
| Amine         | Aniline                      | 10.74 | 2.58 | 0.98 |
| Amine         | 1,2-Benzenediamine           | 17.80 | 3.50 | 1.00 |
| Amine         | 1-Naphthalenamine            | 26.60 | 3.57 | 0.96 |
| Amine         | 4-Biphenylamine              | 31.54 | 3.56 | 0.99 |
| Cycloalkane   | Ethyl-cyclohexane            | 6.59  | 0.99 | 0.95 |
| Cycloalkane   | Butyl-cyclohexane            | 12.59 | 1.12 | 0.99 |
| Cycloalkane   | Hexyl-cyclohexane            | 18.86 | 1.16 | 0.97 |
| Cycloalkane   | Octyl-cyclohexane            | 24.46 | 1.13 | 0.95 |
| Cycloalkane   | Decyl-cyclohexane            | 29.46 | 1.15 | 0.95 |
| Cycloalkane   | Dodecyl-cyclohexane          | 33.93 | 1.21 | 0.97 |
| Cycloalkane   | Tetradecyl-cyclohexane       | 37.99 | 1.24 | 0.97 |
| Cycloalkane   | Hexadecyl-cyclohexane        | 41.66 | 1.29 | 0.98 |
| Ester         | Butyl acetate                | 5.93  | 1.39 | 0.98 |
| Ester         | Amyl Acetate                 | 8.73  | 1.51 | 0.97 |
| Ester         | Isoamyl Acetate              | 7.66  | 1.39 | 0.99 |
| Furan         | Furan                        | 12.46 | 1.40 | 0.96 |
| Ketone        | 2-Nonanone                   | 14.34 | 1.50 | 0.98 |
| Ketone        | 2-Dodecanone                 | 23.00 | 1.43 | 0.97 |
| Ketone        | 2-Pentadecanone              | 30.34 | 1.38 | 0.99 |
| Ketone        | 2-Pentanone                  | 3.53  | 1.09 | 0.99 |
| Ketone        | 3-Heptanone                  | 7.93  | 1.49 | 0.99 |
| Oxy-PAH       | 1,4-Naphthalenedione         | 23.60 | 3.36 | 0.99 |
| Oxy-PAH       | 9,10-Anthracenedione         | 36.07 | 3.85 | 0.99 |
| Oxy-PAH       | Benz(a)anthracene-7,12-dione | 46.74 | 4.62 | 0.98 |
| PAHs          | Indene                       | 12.94 | 2.12 | 0.99 |
| PAHs          | Naphthalene                  | 17.26 | 2.95 | 1.00 |
| PAHs          | Acenaphthylene               | 24.53 | 3.38 | 1.00 |
| PAHs          | Acenaphthene                 | 25.39 | 3.27 | 0.99 |
| PAHs          | Fluorene                     | 27.79 | 3.30 | 1.00 |

|            |                              |       |      |      |
|------------|------------------------------|-------|------|------|
| PAHs       | Phenanthrene                 | 32.26 | 3.73 | 0.99 |
| PAHs       | Anthracene                   | 32.53 | 3.70 | 0.99 |
| PAHs       | Fluoranthene                 | 37.00 | 3.04 | 0.99 |
| PAHs       | Pyrene                       | 38.86 | 4.38 | 0.99 |
| PAHs       | Benz[a]anthracene            | 44.59 | 4.58 | 0.97 |
| PAHs       | Chrysene                     | 44.73 | 4.76 | 0.97 |
| PAHs       | Benzo[b]fluoranthene         | 49.26 | 5.15 | 0.96 |
| PAHs       | Benzo[k]fluoranthene         | 49.39 | 5.15 | 0.98 |
| PAHs       | Benzo[a]pyrene               | 50.53 | 5.61 | 0.97 |
| PAHs       | Indeno[1,2,3-cd]fluoranthene | 55.46 | 3.02 | 0.99 |
| Pinene     | $\alpha$ -Pinene             | 9.46  | 1.19 | 0.95 |
| Pinene     | $\beta$ -Pinene              | 10.86 | 1.35 | 0.99 |
| Polyphenyl | Biphenyl                     | 22.74 | 2.44 | 0.95 |

80

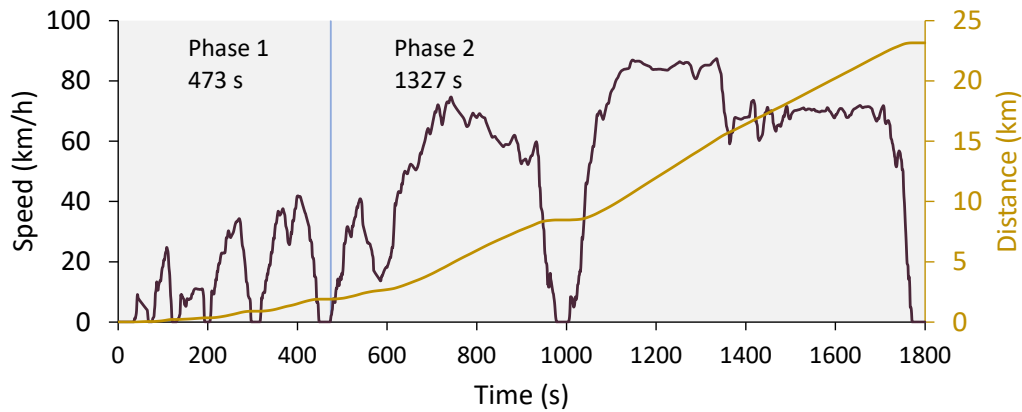

Figure S1. Speed trace for China heavy-duty commercial vehicle test cycle for tractor trailers (CHTC-HT) cycle. The total duration is 1800 s and divided into two phases of 344 s and 1330 s. The average speed is 46.5 km/h, and the idle ratio is 8.6%.

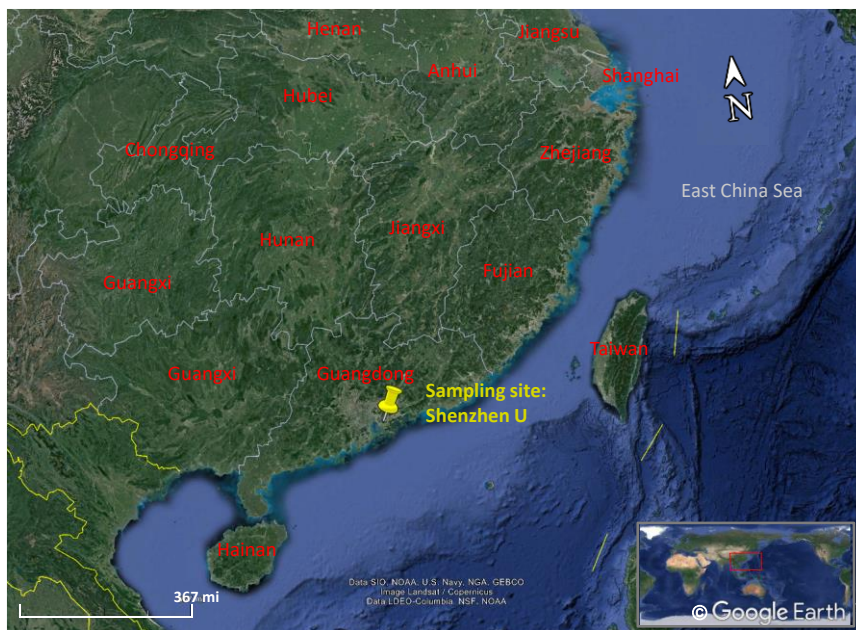

Figure S2. Sampling site location on Shenzhen University campus.  $PM_{2.5}$  high-volume sampler was installed on the rooftop of a 5-story building surrounded by university campus, residential areas, greenbelts, and a golf park.

(a) Radical initiated  $\alpha$ -cleavage

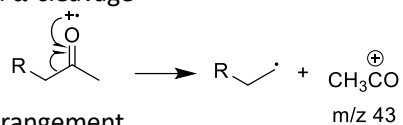

(b) McLafferty rearrangement

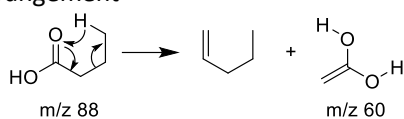

(c) Loss of  $\text{CH}_2\text{OH}$

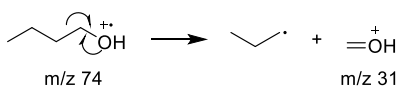

(d) Loss of  $\text{H}_2\text{O}$

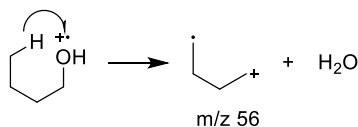

(e)  $\beta$ -cleavage

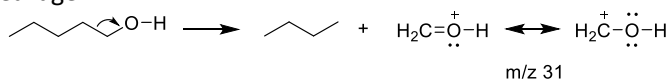

(f) Ester with acid portion dominant

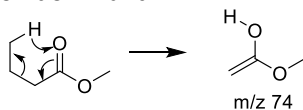

(g) Ester with alcohol portion dominant

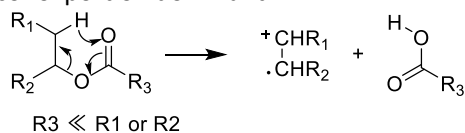

Figure S3. Interpretation of characteristic ions in the EI spectrum for O-containing species, including (a) aliphatic ketones, (b-d) aliphatic alcohols, (e) carboxylic acids, (f) esters with acid portion dominant, and (g) esters with alcohol portion dominant.

(a) Radical initiated  $\alpha$ -cleavage

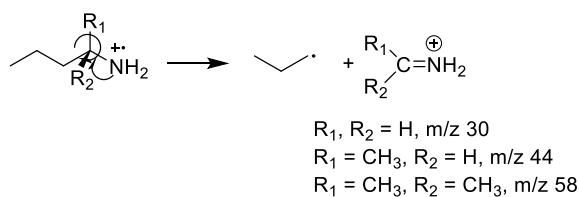

(b) McLafferty rearrangement

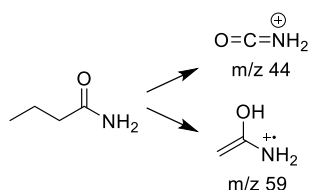

(c) Loss of HCN

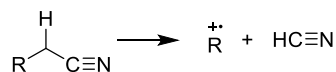

(d) McLafferty rearrangement

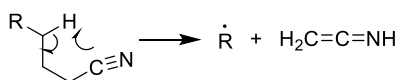

(e) Loss of  $NO_2$

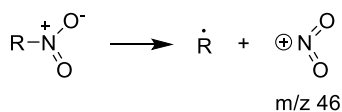

(f) Loss of NO

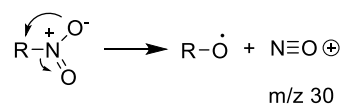

Figure S4. Interpretation of the characteristic ions in the EI spectrum for N-containing species, including (a) aliphatic amines, (b) amides, (c) and (d) nitriles, and (e) organic nitrates, and (e) organic nitrites.

Open Canvas → Open Browser → File → Load Data (load a sample) → Speciation → Find All Peaks → Mass Spectrum → Extraction Rules

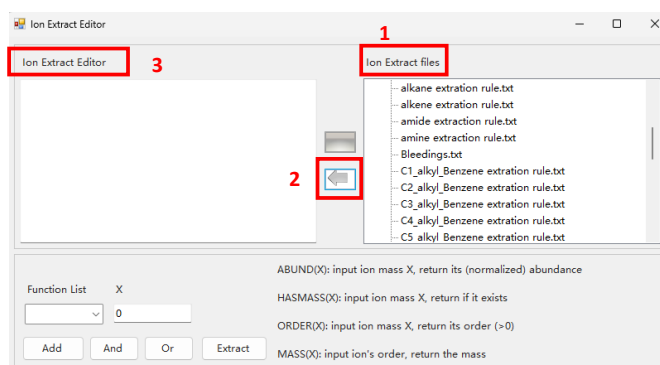

Figure S5. The steps to enable the ion extract function built in Canvas.

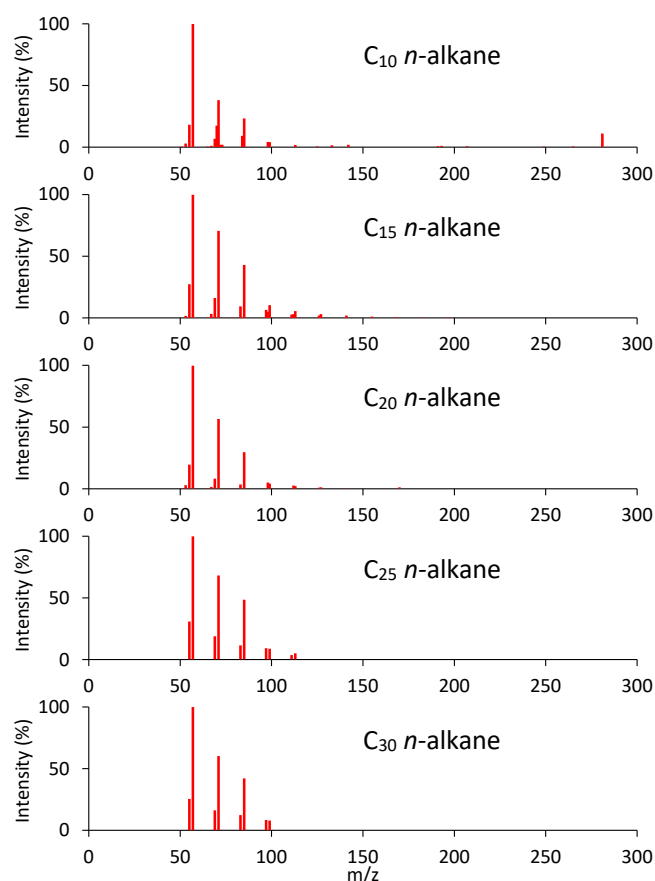

Figure S6. The mass spectra of homologous *n*-alkane standards from C<sub>10</sub> to C<sub>30</sub>, which exhibit high similarity. In such cases, the similarity score could be elevated incorrectly and mislead compound identification results.

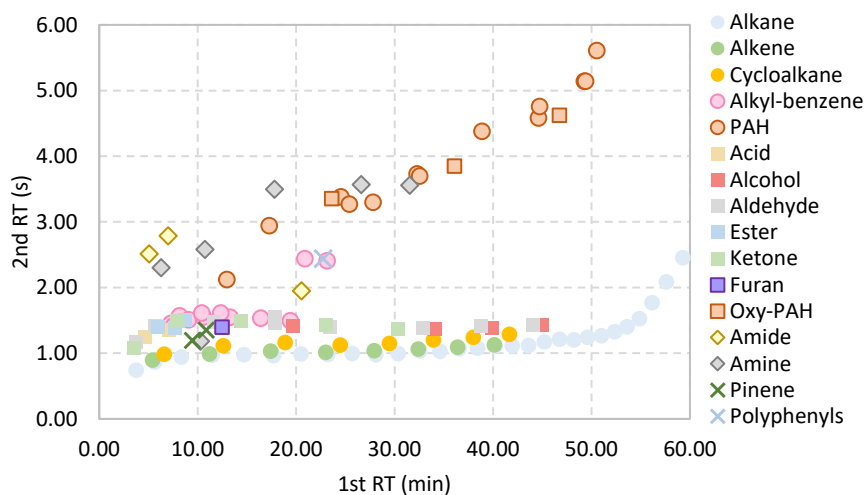

Figure S7. The distribution of all authentic standards, coded by colors and shapes.

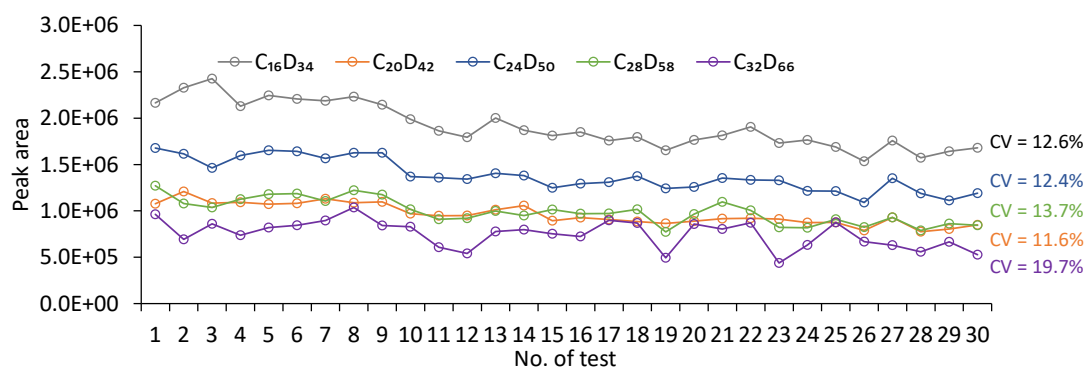

Figure S8. The variation of peak areas of internal standards tested throughout the whole measurement.

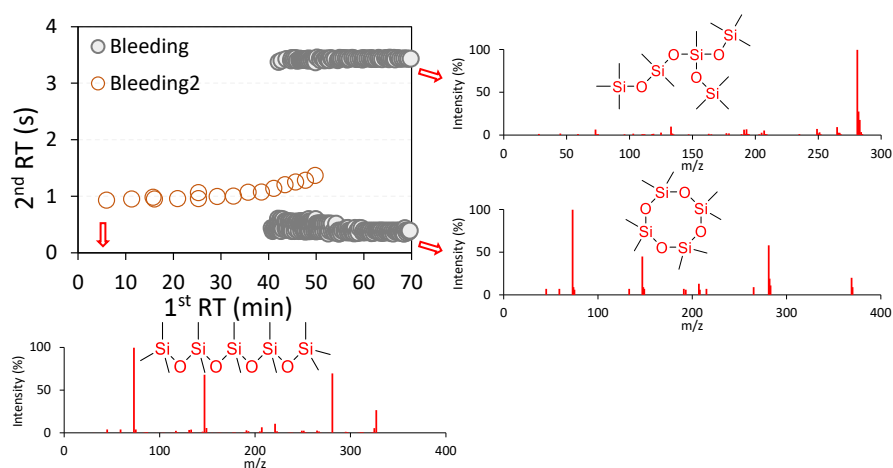

Figure S9. The distribution of the column bleedings in an example GCxGC plot and their respective mass spectra and chemical structures.

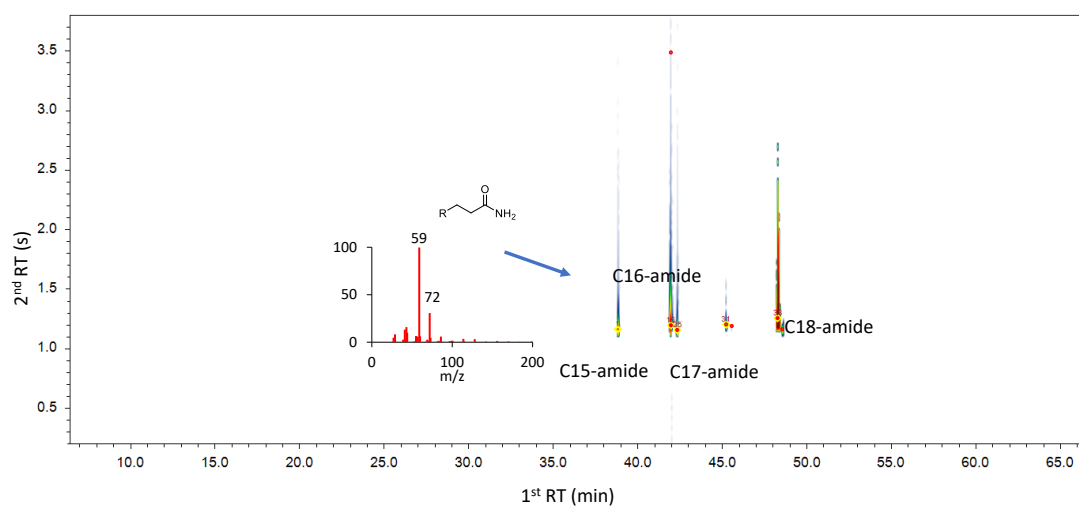

Figure S10. The chromatogram and mass spectra of tentatively identified amide representatives.

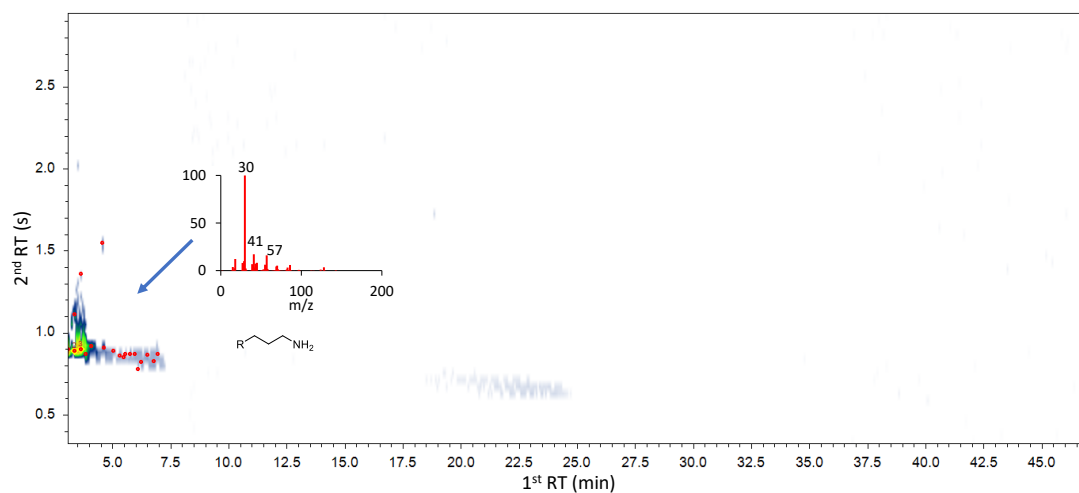

Figure S11. The chromatogram and mass spectra of tentatively identified amine representatives.

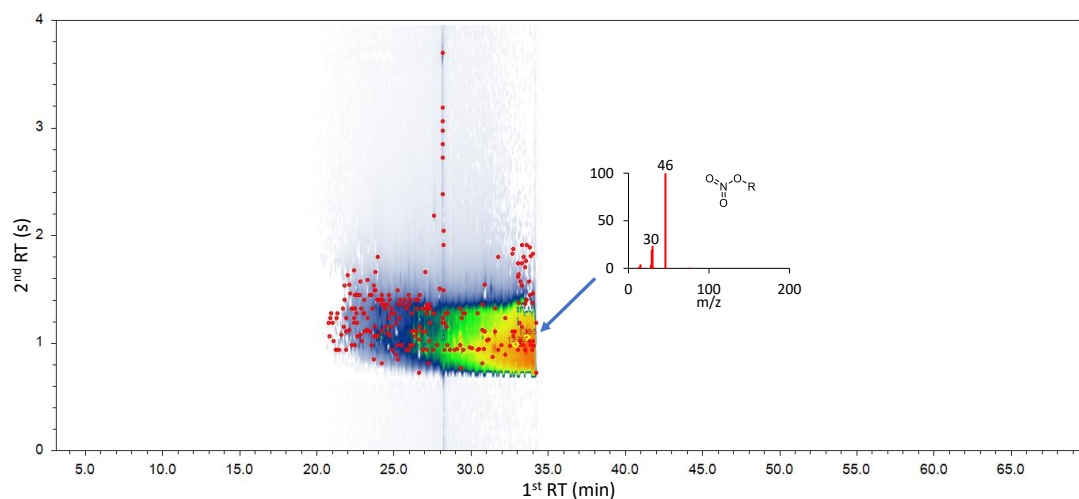

Figure S12. The chromatogram and mass spectra of tentatively identified nitro representatives.

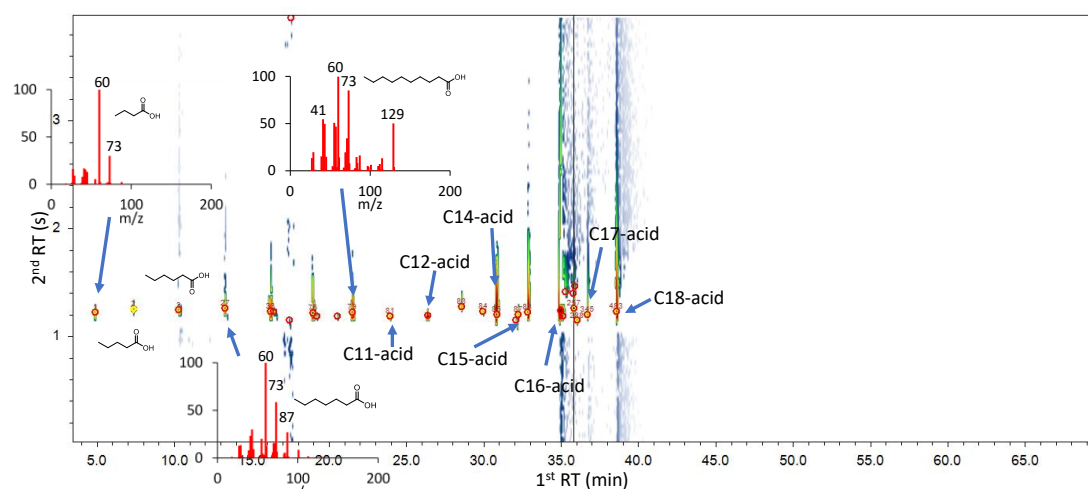

Figure S13. The chromatogram and mass spectra of tentatively identified aliphatic acid representatives.

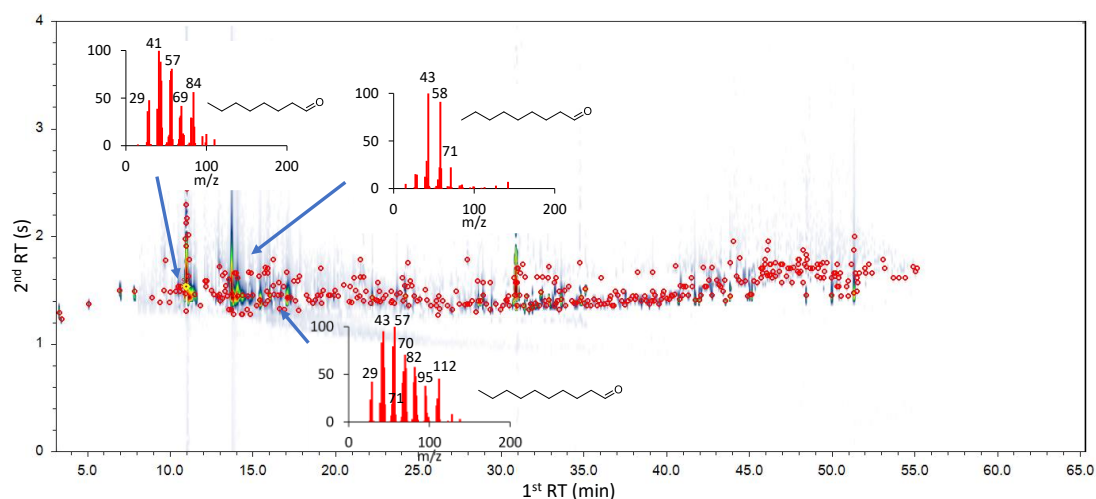

Figure S14. The chromatogram and mass spectra of tentatively identified aliphatic aldehyde and ketone representatives.

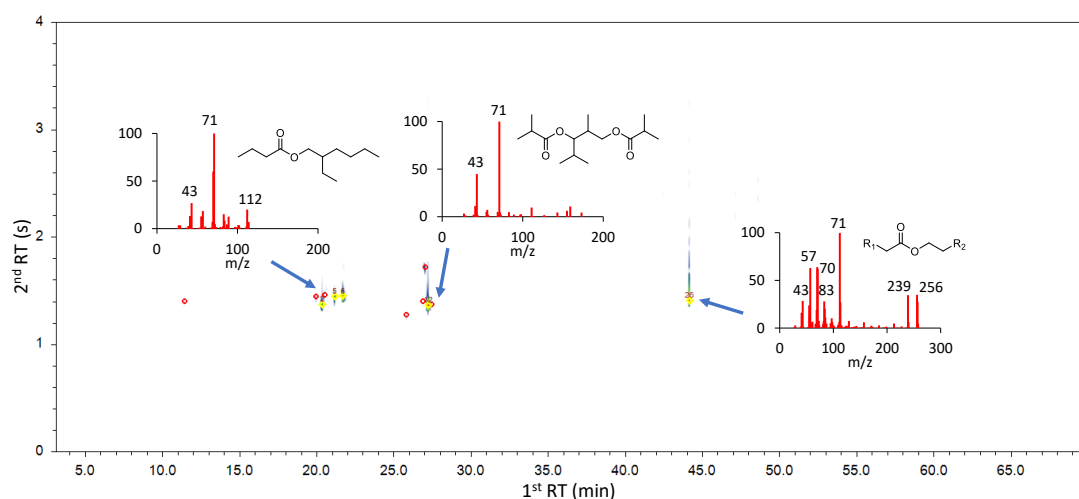

Figure S15. The chromatogram and mass spectra of tentatively identified aliphatic ester representatives.

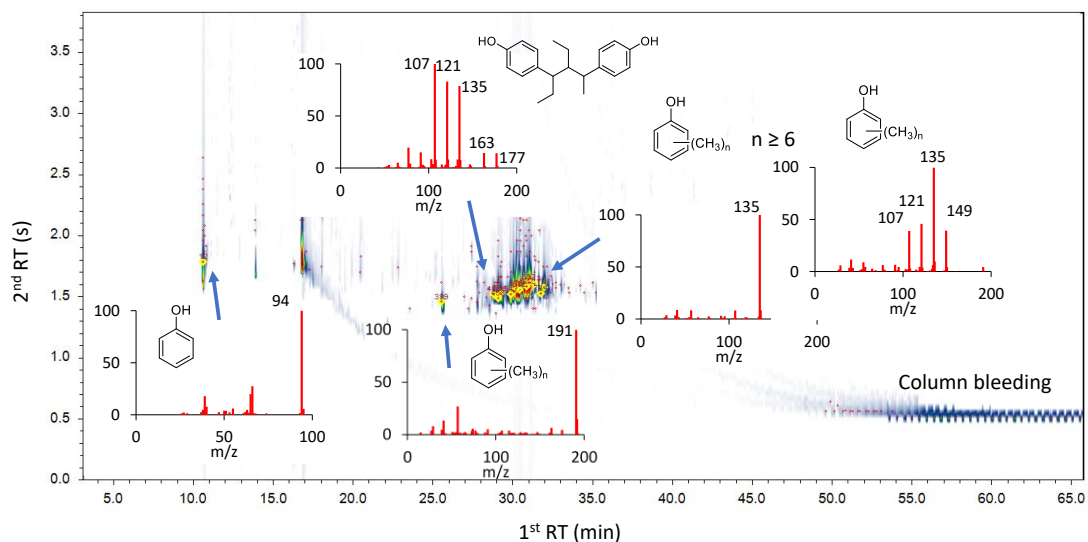

Figure S16. The chromatogram and mass spectra of tentatively identified phenol and alkyl-substituted phenol representatives in HDDV vapor samples.

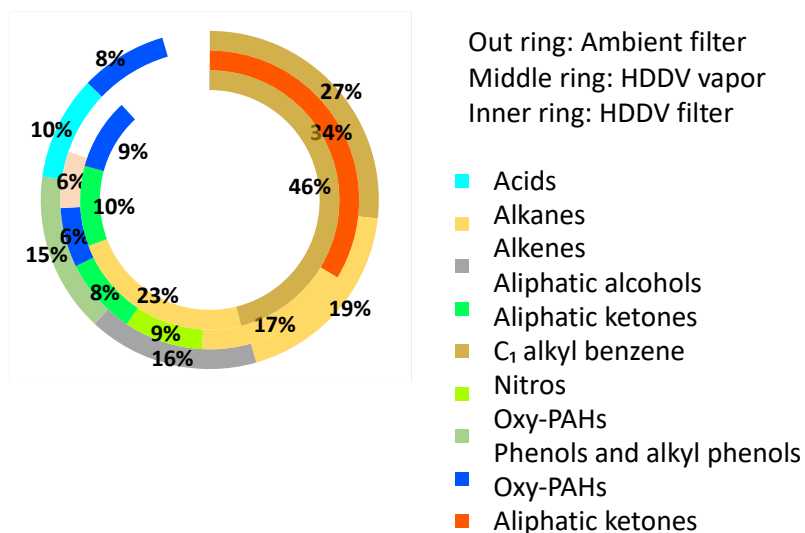

Figure S17. The top few species (contribution fraction exceeding 5%) distributions in different samples: the out ring refers to the ambient aerosol sample, the middle ring refers to the HDDV tailpipe vapor emission, and the inner ring refers to the HDDV tailpipe aerosol emission.

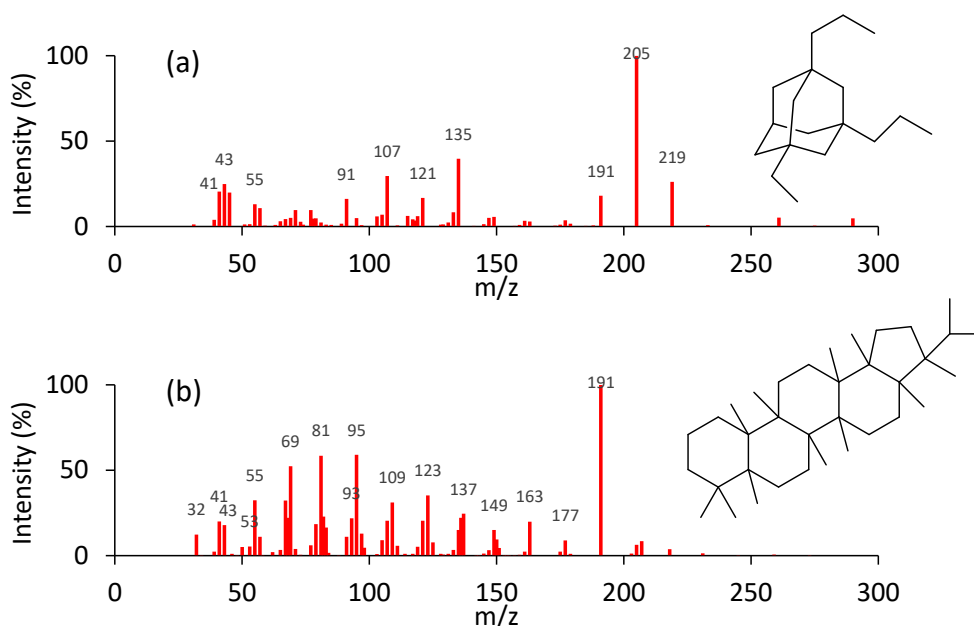

Figure S18. The chemical structures and mass spectra of (a) 1.1-Ethyl-3,5-dipropyladamantane and (b) 17 $\alpha$ (H),21 $\beta$ (H)-hopane.

#### References:

- Harrison A. G.: Pathways for water loss from doubly protonated peptides containing serine or threonine. *J Am Soc Mass Spectrom*, 23, 116-123, <https://www.ncbi.nlm.nih.gov/pubmed/22065406>, 2012.
- He X., Huang X. H. H., Chow K. S., Wang Q., Zhang T., Wu D. and Yu J. Z.: Abundance and Sources of Phthalic Acids, Benzene-Tricarboxylic Acids, and Phenolic Acids in PM<sub>2.5</sub> at Urban and Suburban Sites in Southern China. *ACS Earth and Space Chemistry*, 2, 147-158, 2018.
- Lavanchy A., Houriet R. and Gäumann T.: The mass spectrometric fragmentation of n-alkanes. *Organic Mass Spectrometry*, 14, 79-85, <https://doi.org/10.1002/oms.1210140205>, 1979.
- McLafferty F. W.: Mass Spectrometric Analysis. Molecular Rearrangements. *Anal Chem*, 31, 82-87, <https://dx.doi.org/10.1021/ac60145a015>, 1959.
- Mikaia A.: Protocol for Structure Determination of Unknowns by EI Mass Spectrometry. I. Diagnostic Ions for Acyclic Compounds with up to One Functional Group. *Journal of Physical and Chemical Reference Data*, 51, 031501, 2022.
